# Supplementary material
Source: publisher site journal article supplement (https://www.spandidos-publications.com/7954/downloadSupplementary)
Supplement: Supplementary file [file downloadSupplementary]

**Table S1.** Primer sequences.

| <b>Gene</b>  | <b>Primer sequence, 5'→3'</b>                           |
|--------------|---------------------------------------------------------|
| <i>GSK3B</i> | F: TACCACTCAAGAACTGTCAA<br>R: CACGGTCTCCAGCATTAG        |
| <i>EGR1</i>  | F: GGCTCTTAATACCACCTACC<br>R: TCACTACGACTGAAGTTACG      |
| <i>GAPDH</i> | F: AGAAGGTGGTGAAGCAGGCATCT<br>R: CGGCATCGAAGGTGGAAGAGTG |

GSK3B, Glycogen Synthase Kinase-3 $\beta$ ; EGR1, early growth response 1; F, forward; R, reverse.

**Table SII.** Subgroups and basic characteristics.

| <b>Characteristic</b> | <b>HC (n=43)</b> | <b>KOA (n=43)</b> | <b>AS (n=43)</b> | <b>MM (n=43)</b> | <b>Total (n=172)</b> |
|-----------------------|------------------|-------------------|------------------|------------------|----------------------|
| Mean age, years       | 37.14±3.59       | 43.30±8.32        | 37.91±4.63       | 51.19±5.59       | 42.38±8.07           |
| Median age, years     | 36               | 41                | 38               | 51               | 40                   |
| Age range             | 31-46            | 33-59             | 27-49            | 36-59            | 27-59                |
| Male (%)              | 26 (60.47)       | 30 (69.77)        | 28 (65.12)       | 39 (90.70)       | 123 (71.51)          |
| Female (%)            | 17 (39.53)       | 13 (30.23)        | 15 (34.88)       | 4 (9.30)         | 49 (28.49)           |

KOA, knee osteoarthritis; AS, atherosclerosis; HC, healthy control group; MM, KOA-AS multimorbidity group.

**Table SIII.** Subgroups and basic characteristics for metabolomics.

| <b>Characteristics</b> | <b>HC (n=33)</b> | <b>KOA (n=33)</b> | <b>AS (n=33)</b> | <b>MM (n=33)</b> | <b>Total (n=132)</b> |
|------------------------|------------------|-------------------|------------------|------------------|----------------------|
| Mean age, years        | 36.24±3.10       | 42.21±9.13        | 37.45±3.65       | 49.91±7.28       | 41.45±8.28           |
| Median Age             | 35               | 38                | 38               | 51               | 38                   |
| Age range              | 31~45            | 33~59             | 30~44            | 34~59            | 30~59                |
| Male (%)               | 19 (57.60)       | 22 (66.70)        | 19 (57.60)       | 29 (87.90)       | 89 (67.42)           |
| Female (%)             | 14 (42.40)       | 11 (33.30)        | 14 (42.40)       | 4 (12.10)        | 43 (32.58)           |

KOA, knee osteoarthritis; AS, atherosclerosis; HC, healthy control group; MM, KOA-AS multimorbidity group.

**Table SIV.** Relative serum levels of caffeine and its secondary metabolites.

| <b>Metabolite</b>     | <b>HC</b> | <b>KOA</b> | <b>AS</b> | <b>MM</b> |
|-----------------------|-----------|------------|-----------|-----------|
| Caffeine              | 1692.68   | 2997.53    | 4759.91   | 9840.81   |
| Theophylline          | 380.01    | 783.62     | 803.83    | 2448.50   |
| 1-Methyluric acid     | 50.15     | 91.97      | 66.89     | 179.43    |
| 1-Methylxanthine      | 148.38    | 292.02     | 200.16    | 412.05    |
| 1,7-Dimethyluric acid | 54.80     | 136.77     | 120.97    | 354.09    |

Data are presented as relative levels scaled by a factor of  $10^{-4}$ . KOA, knee osteoarthritis; AS, atherosclerosis; HC, healthy control group; MM, KOA-AS multimorbidity.
